# Supplementary material
Source: PubMed Central journal article supplement (PMC9691594)
Supplement: NIHMS1846275-supplement-6.pdf [file NIHMS1846275-supplement-6.pdf]

**Table S1. Comparison of DNA array-based spatial transcriptomic assays**

| ST method   | DNA features          | Barcode sequencing for each array | Feature diameter(s) (μm) | Feature center distance(s) (μm) | Percentage of array area covered by features <sup>a</sup> | Feature density (features per mm <sup>2</sup> )     | Array substrate <sup>b</sup>        | Tissue used for ST assays <sup>c</sup>                           | cDNA synthesis & amplification methods <sup>d</sup> | Mean UMIs <sup>e</sup> | Data                                   |
|-------------|-----------------------|-----------------------------------|--------------------------|---------------------------------|-----------------------------------------------------------|-----------------------------------------------------|-------------------------------------|------------------------------------------------------------------|-----------------------------------------------------|------------------------|----------------------------------------|
| Visium      | Spotted DNAs          | No                                | 55                       | 100                             | 27%                                                       | ~110                                                | Glass                               | Mouse OB, 10-μm thickness, tissue fixation & permeabilization    | TSO & PCR                                           | 15,377/55 μm           | GSE153859 (10.1101/2020.08.24.252296)  |
| DBiT-seq    | Microfluidic wells    | No                                | 1) 10<br>2) 20<br>3) 50  | 1) 20<br>2) 40<br>3) 100        | 25%                                                       | 1) 2500<br>2) 625<br>3) 100                         | Microfluidic channel-divided tissue | Mouse embryo, 7-μm thickness, tissue fixation & permeabilization | TSO & PCR                                           | ~5,000/10 μm           | GSE137986 (10.1016/j.cell.2020.10.026) |
| Slide-seqV2 | Assembled beads       | Yes                               | 10                       | 10                              | 78%                                                       | 1 × 10 <sup>4</sup>                                 | Glass                               | Mouse OB, 10-μm thickness, fresh frozen                          | RPE & PCR                                           | 494/10 μm              | (10.1038/s41587-020-0739-1)            |
| HDST        | Assembled beads       | Yes                               | 2                        | 3                               | 34%                                                       | 1.07 × 10 <sup>5</sup>                              | Silicon                             | Mouse OB, 10-μm thickness, tissue fixation & permeabilization    | T7 aRNA                                             | 12/10 μm or 2/2 μm     | GSE130682 (10.1038/s41592-019-0548-y)  |
| Seq-Scope   | Illumina DNA clusters | Yes                               | ≥ 0.5                    | ≤ 0.8                           | ≤ 70%                                                     | ≤ 1.5 × 10 <sup>6</sup>                             | Linear PAA coating                  | Mouse liver, 10-μm thickness, tissue fixation & permeabilization | RPE & PCR                                           | ~1000/10 μm            | GSE169706 (10.1016/j.cell.2021.05.010) |
| Stereo-seq  | DNA nanoballs         | Yes                               | 0.22                     | 1) 0.5<br>2) 0.715              | 1) 15%<br>2) 7%                                           | 1) 4 × 10 <sup>6</sup><br>2) 1.96 × 10 <sup>6</sup> | Silicon                             | Mouse OB, 10-μm thickness, tissue fixation & permeabilization    | RPE & PCR                                           | ~1450/10 μm or 59/2 μm | GSE153164 (10.1016/j.cell.2022.04.003) |
| Pixel-seq   | Polonies              | No                                | ~1                       | ~1                              | > 90%                                                     | ≤ 1 × 10 <sup>6</sup>                               | Crosslinked PAA gel                 | Mouse OB, 10-μm thickness, fresh frozen                          | TSO & PCR                                           | 977/10 μm or 47/2 μm   | GSE186097                              |

**Notes:**

<sup>a</sup>: The percentages for Visium, DBiT-Seq, Slide-seqV2, HDST, and Stereo-seq were calculated based on reported feature sizes, densities, and spatial patterns.

The percentage for Seq-scope was measured by analyzing a reported cluster image of the flowcell hybridized with the highest template concentration (100 pM).

<sup>b</sup>: PAA, polyacrylamide.

<sup>c</sup>: Different RNA capturing conditions were used in ST methods and some captured RNAs from multiple cell layers from a whole tissue section.

<sup>d</sup>: TSO, template-switching oligo; RPE, random priming and extension; T7 aRNA, T7 RNA polymerase-based amplification.

Different amplification methods have different yields. RPE can increase the capture efficiency.

<sup>e</sup>: UMI counts were obtained from the original publications.

**Table S2. Consumable lists for the stamping and sequencing-based polony gel fabrication**

| Fabrication step                                                                                                                | Reagents & consumables                 | Vender              | Catalog number | Size                        | UW price (USD) | Amount             | Cost (USD)/gel                                 |
|---------------------------------------------------------------------------------------------------------------------------------|----------------------------------------|---------------------|----------------|-----------------------------|----------------|--------------------|------------------------------------------------|
| Glass cleaning                                                                                                                  | Microscope slide                       | Fisher Scientific   | 12-550D        | 144 pieces/pack             | 20.0           | 1 piece/gel        | 0.14                                           |
|                                                                                                                                 | Contrad 70                             | Decon               | 1003           | 1.33 gallon                 | 141            | 25 mL/60 gels      | 0.01                                           |
| Glass surface modification                                                                                                      | 200 proof ethanol                      | Decon               | 2701           | 4 × 4 gallon                | 58.5           | 360 mL/60 gels     | 0.01                                           |
|                                                                                                                                 | Blind-Silane                           | Sigma-Aldrich       | M6514          | 50 mL                       | 88.9           | 2 mL/60 gels       | 0.06                                           |
|                                                                                                                                 | Acetic acid                            | Fisher Scientific   | A35-500        | 500 mL                      | 33.9           | 4 mL/60 gels       | 0.01                                           |
| Gel casting                                                                                                                     | Acrylamide                             | Sigma-Aldrich       | A9099          | 100 g                       | 76.1           | 2 g/200 gels       | 0.01                                           |
|                                                                                                                                 | N,N'-methylenebisacrylamide            | Sigma-Aldrich       | M7279          | 100 g                       | 145            | 0.5 g/200 gels     | 0.01                                           |
|                                                                                                                                 | Ammonium persulfate                    | Sigma-Aldrich       | A3678          | 25 g                        | 32.2           | 100 mg/10 gels     | 0.01                                           |
|                                                                                                                                 | TEMED                                  | Invitrogen          | 15524-010      | 30 mL                       | 48.1           | 10 µL/10 gels      | 0.01                                           |
|                                                                                                                                 | N-(5-bromoacetamidylphenyl) acrylamide | Combi-blocks        | HD-8626        | 1 g                         | 3,600          | 70 mg/100 gels     | 2.52                                           |
|                                                                                                                                 | N, N-dimethylformamide                 | Sigma-Aldrich       | D4551          | 250 mL                      | 42.7           | 500 µL/200 gels    | 0.01                                           |
| Primer grafting                                                                                                                 | Potassium phosphate dibasic trihydrate | Sigma-Aldrich       | P9666          | 100 g                       | 41.3           | 1 g/200 gels       | 0.01                                           |
|                                                                                                                                 | Potassium phosphate monobasic          | Sigma-Aldrich       | P9791          | 100 g                       | 26.9           | 1 g/200 gels       | 0.01                                           |
|                                                                                                                                 | Bridge amplification primers           | IDT                 | PS-BA(+)       | 3 µmole (3 mL × 1mM)        | 528            | 50 µL/10 gels      | 0.88                                           |
|                                                                                                                                 |                                        |                     | PS-BA(-)       | 2.83 µmole (2.83 mL × 1 mM) | 597            | 50 µL/10 gels      | 1.05                                           |
| Polony amplification                                                                                                            | Betaine                                | Sigma-Aldrich       | B2629          | 1 kg                        | 176            | 234.3 g/20 gels    | 2.06                                           |
|                                                                                                                                 | Trizma base                            | Sigma-Aldrich       | 93362          | 500 g                       | 266            | 2.42 g/20 gels     | 0.06                                           |
|                                                                                                                                 | Ammonium sulfate                       | Sigma-Aldrich       | A4418          | 500 g                       | 79.5           | 1.32 g/25 gels     | 0.01                                           |
|                                                                                                                                 | Magnesium sulfate                      | Sigma-Aldrich       | M2773          | 500 g                       | 65.6           | 0.49 g/20 gels     | 0.01                                           |
|                                                                                                                                 | Triton X-100                           | Sigma-Aldrich       | T8787          | 250 mL                      | 90.1           | 1 mL/20 gels       | 0.02                                           |
|                                                                                                                                 | Dimethyl sulfoxide                     | Sigma-Aldrich       | D8418          | 1 L                         | 315            | 13 mL/20 gels      | 0.20                                           |
|                                                                                                                                 | Formamide (deionized)                  | Emdmillipore        | 4670-4L        | 4 L                         | 447            | 25 mL/gel          | 2.79                                           |
|                                                                                                                                 | Bst enzyme                             | Lab purified        | ----           | ----                        | ----           | ----               | < 1                                            |
| Gel stamping                                                                                                                    | dNTP (10 mM each)                      | GenScript           | C01582-250     | 250 mL                      | 2,500          | 320 µL/gel         | 3.20                                           |
|                                                                                                                                 | Taq DNA polymerase                     | New England Biolabs | M0267X         | 4000 units (800 µL)         | 370            | 15 µL/20 gels      | 0.35                                           |
| TaqI digestion                                                                                                                  | Taq I-v2                               | New England Biolabs | R0149L         | 20,000 units (1 mL)         | 210            | 16 µL/gel          | 3.35                                           |
| <b>Total cost of the stamping-based fabrication of six 7×7 mm<sup>2</sup> arrays on a ~55×9 mm<sup>2</sup> copy gel: \$17.8</b> |                                        |                     |                |                             |                |                    |                                                |
|                                                                                                                                 |                                        |                     |                |                             |                |                    | <b>Cost / 7×7 mm<sup>2</sup> array: \$2.96</b> |
| Barcode sequencing (e.g., sequencing a gel of ~22×9 mm <sup>2</sup> )                                                           | USER enzyme                            | New England Biolabs | M5505L         | 250 units (0.25 ml)         | 249            | 16 µL/gel          | 15.92                                          |
|                                                                                                                                 | Sequencing primer                      | IDT                 |                | 50 nmole (5 mL × 100 µM)    | 137            | 30 µL × 100 µm/gel | 0.82                                           |
|                                                                                                                                 | Illumina Hiseq V4 kit (no flowcell)    | Illumina            | FC-401-4002    | 50 cycles                   | 2,805          | 1 kit/10 gels      | 280.50                                         |
| <b>Total cost of the sequencing-based fabrication of three 7×7 mm<sup>2</sup> arrays on a ~35×9 mm<sup>2</sup> gel: \$315</b>   |                                        |                     |                |                             |                |                    |                                                |
|                                                                                                                                 |                                        |                     |                |                             |                |                    | <b>Cost / 7×7 mm<sup>2</sup> array: \$105</b>  |

**Table S3. Comparison of DNA cluster and DNA nanoball-based assays**

|                                                    | Seq-Scope <sup>a</sup>       | Stereo-seq <sup>b</sup>                 | Pixel-seq <sup>c</sup> |                    |
|----------------------------------------------------|------------------------------|-----------------------------------------|------------------------|--------------------|
|                                                    |                              |                                         | Sequenced gel          | Stamped gel        |
| <b>DNA array size(s) (mm<sup>2</sup>)</b>          | 30.4<br>(1 × 0.8) × 38 tiles | 50 - 200<br>10 × 5, 10 × 10, or 20 × 10 | 147<br>(7 × 7) × 3     | 294<br>(7 × 7) × 6 |
| <b>Array fabrication cost (per mm<sup>2</sup>)</b> | ~\$150                       | ~\$35                                   | ~\$2.20                | ~\$0.06            |
| <b>Array fabrication time (hour)</b>               | ~17                          | ~9                                      | ~36                    | ~7                 |
| <b>Library preparation time (hour)</b>             | ~19                          | ~9                                      |                        | ~6                 |
| <b>Library sequencing platform(s)</b>              | Illumina and BGI platforms   | MGI DNBSEQ-Tx                           |                        | NovaSeq 6000       |

<sup>a</sup>: Array cost is based on MiSeq v3 flowcells used in the original publication. Times were calculated based on the reported protocol.

<sup>b</sup>: Arrays were subdivided from a large chip up to 13.2 × 13.2 cm<sup>2</sup>. Times were calculated based on the reported protocol.

<sup>c</sup>: Detailed cost analysis is in Table S2. Compared with Seq-Scope and Stereo-seq, the sequencing-based gel fabrication had a much lower cost partly because polony gels were fabricated on standard coverslips or glass slides instead of using commercial sequencing flowcells, and a longer time mainly due to the use of an in-house built sequencer with a much slower imaging speed than commercial sequencers.
